# Supplementary material
Source: MDPI journal article supplement (https://www.mdpi.com/2304-6740/5/4/68)
Supplement: s1 [file s1]

# The decomposition products of sulfur hexafluoride ( $\text{SF}_6$ ) with metals dissolved in liquid ammonia

H. Lars Deubner and Florian Kraus

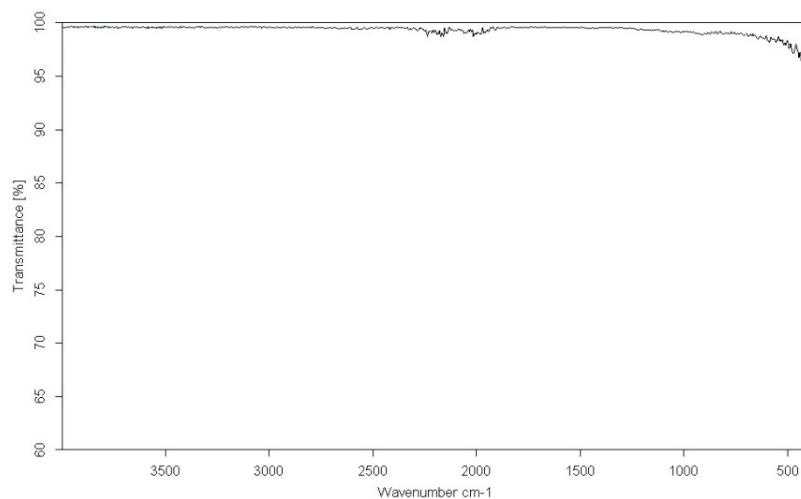

Figure S1: IR spectrum of RbF and Rb<sub>2</sub>S measured on an ATR diamond module.

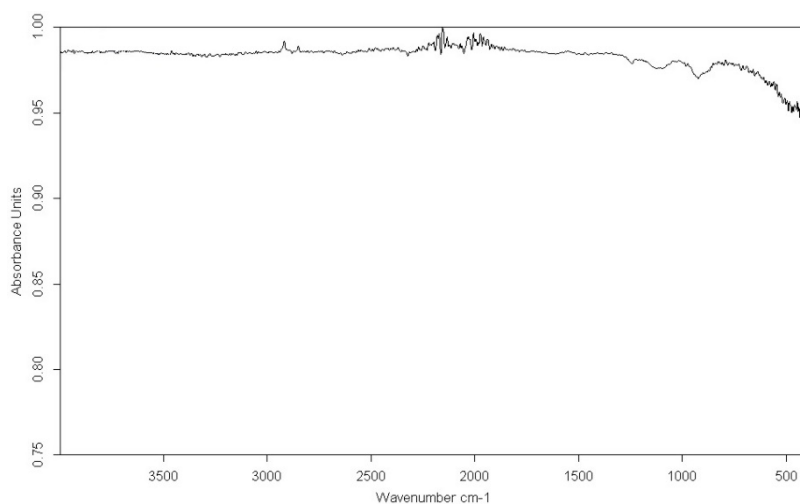

Figure S2: IR spectrum of SrF<sub>2</sub> and SrS measured on an ATR diamond module.
